# Supplementary material for: Effective fall prevention exercise in residential aged care: an intervention component analysis from an updated systematic review
Source: HighWire-hosted journal article supplement (doi:10.1136/bjsports-2023-107505), 2024-04-24
Supplement: bjsports-2023-107505supp002_data_supplement.pdf [file bjsports-2023-107505supp002_data_supplement.pdf]

## Supplementary material B: ProFaNE Components of the included trials

| First author, year              | Type of exercise (ex.) according to ProFaNE classification a |                              |                      |        |                           |                 |             | Duration in weeks | Total hours b | Delivery Mode c | Ex. supervised | Part. per group d | Program leader | Exercise tailored to individual | Exercise progressed | Exercise Intensity |
|---------------------------------|--------------------------------------------------------------|------------------------------|----------------------|--------|---------------------------|-----------------|-------------|-------------------|---------------|-----------------|----------------|-------------------|----------------|---------------------------------|---------------------|--------------------|
|                                 | Gait, Balance functional                                     | Strength/resistance training | Flexibility training | 3D ex. | General Physical Activity | Endurance exer. | Other exer. |                   |               |                 |                |                   |                |                                 |                     |                    |
| Arrieta, 2019                   | P                                                            | P                            | S                    |        |                           |                 |             | 26                | 52            | 1               | Y              | NR                | EP             | Y                               | Y                   | Mod                |
| Brett, 2021                     | P                                                            | P                            | S                    |        | S                         |                 |             | 12                | 9             | 1               | Y              | 5                 | PT             | Y                               | Y                   | Mod                |
| Buckinx, 2014                   | S                                                            | S                            |                      |        |                           |                 | P           | 26                | 1.5           | 2               | Y              | NA                | PT             | N                               | N                   | Low                |
| Buettner 2002                   | P                                                            | P                            |                      |        | P                         |                 | S           | 12                | 24            | 1               | Y              | 4                 | TNP            | N                               | N                   | Low                |
| Cadore 2014                     | P                                                            | P                            | S                    |        |                           |                 |             | 12                | 16            | 2               | Y              | NA                | TNP            | Y                               | Y                   | Mod                |
| Choi 2005                       |                                                              |                              |                      | P      |                           |                 |             | 12                | 21            | 1               | Y              | 29                | TNP            | N                               | N                   | Low                |
| Da Silva Borges 2014            |                                                              |                              | S                    | P      |                           |                 |             | 12                | 30            | NR              | Y              | NR                | NR             | Y                               | Y                   | High               |
| Dhargrave 2020                  | P                                                            | P                            | S                    |        | S                         |                 |             | 12                | 42            | 2               | Partial        | NA                | PT             | Y                               | Y                   | Mod                |
| Faber 2006 – Functional walking | P                                                            | P                            |                      |        |                           |                 |             | 20                | 36            | 1               | Y              | 12                | TNP            | Y                               | Y                   | Mod                |
| Faber 2006 – In balance group   |                                                              |                              |                      | P      |                           |                 |             | 20                | 36            | 1               | Y              | 12                | TNP            | Y                               | Y                   | Low                |
| Fu 2015                         | P                                                            |                              |                      |        | Fu                        |                 |             | 6                 | 18            | NR              | Y              | NR                | PT             | Y                               | Y                   | NR                 |
| Hewitt 2018                     | P                                                            | P                            | S                    |        |                           |                 |             | 52                | 76            | 1               | Y              | 5                 | PT             | Y                               | Y                   | Mod                |
| Imaoka 2016                     | P                                                            | P                            |                      |        |                           |                 |             | 12                | 6             | 1               | Y              | NA                | PT             | Y                               | NR                  | Mod                |
| Irez 2011                       | P                                                            | P                            | S                    |        |                           |                 |             | 12                | 36            | 1               | Y              | NR                | TNP            | Y                               | Y                   | Mod                |

| First author, year         | Type of exercise (ex.) according to ProFaNE classification a |                              |                      |        |                           |               |           | Duration in weeks | Total hours b | Delivery Mode c | Ex. supervised | Part. per group d | Program leader | Exercise tailored to individual | Exercise progressed | Exercise intensity |
|----------------------------|--------------------------------------------------------------|------------------------------|----------------------|--------|---------------------------|---------------|-----------|-------------------|---------------|-----------------|----------------|-------------------|----------------|---------------------------------|---------------------|--------------------|
|                            | Balance, Gait or functional                                  | Strength/resistance Training | Flexibility training | 3D ex. | General Physical Activity | Endurance ex. | Other ex. |                   |               |                 |                |                   |                |                                 |                     |                    |
| Jahanpeyma 2020            | P                                                            | P                            | S                    |        | S                         |               |           | 12                | 27            | 1               | Y              | 9                 | TNP            | Y                               | Y                   | Mod                |
| Kerse 2008                 | P                                                            |                              |                      |        |                           |               |           | 26                | 91            | 2               | Y              | NA                | TNP            | Y                               | Y                   | Low                |
| Kovacs 2012                | P                                                            | P                            | S                    |        | P                         |               |           | 26                | 52            | 1               | Y              | 6                 | PT             | Y                               | Y                   | Mod                |
| Kovacs 2013                | P                                                            | P                            | S                    |        | P                         |               |           | 52                | 104           | 1               | Y              | 4                 | PT             | Y                               | Y                   | Mod                |
| Mulrow 1994                | P                                                            | P                            | S                    |        |                           |               |           | 16                | 24            | 2               | Y              | NA                | PT             | Y                               | Y                   | Low                |
| Nowalk 2001 LL/TC          |                                                              |                              |                      | P      |                           |               |           | 104               | NR            | NR              | Y              | NA                | TNP            | N                               | N                   | Low                |
| Nowalk 2001 FNBF           |                                                              | P                            |                      |        |                           | P             |           | 104               | NR            | NR              | Y              | NA                | EP             | Y                               | Partial             | Low                |
| Rosendahl 2008             | P                                                            | P                            |                      |        |                           |               |           | 12                | 22            | 1               | Y              | 9                 | PT             | Y                               | Y                   | High               |
| Sakamoto 2006              | P                                                            |                              |                      |        |                           |               |           | 26                | 18            | 2               | Y              | NA                | PT             | N                               | N                   | Low                |
| Saravanakumar 2014 Yoga    |                                                              |                              |                      | P      |                           |               |           | 14                | 14            | 1               | Y              | 11                | TNP            | Partial                         | N                   | Low                |
| Saravanakumar 2014 Tai Chi |                                                              |                              |                      | P      |                           |               |           | 14                | 14            | 1               | Y              | 11                | TNP            | Partial                         | N                   | Low                |
| Schoenfelder 2000          |                                                              | P                            |                      |        | P                         |               |           | 12                | 12            | 2               | Y              | NA                | TNP            | N                               | Y                   | Low                |
| Serra-Rexach 2011          |                                                              | P                            | S                    |        |                           | P             |           | 8                 | 18            | 2               | Y              | NA                | TNP            | Y                               | Y                   | Low to mod         |
| Shimada 2004               | P                                                            |                              |                      |        |                           |               |           | 6                 | 10            | 2               | Y              | NA                | NR             | Y                               | Y                   | Mod                |
| Sihvonen 2004              | P                                                            |                              |                      |        |                           |               |           | 4                 | 26            | 2               | Y              | NA                | NR             | Partial                         | N                   | Mod                |
| Sitja Rabert 2015          | P                                                            | P                            |                      |        |                           |               | P         | 9                 | 6             | 1               | Y              | 5                 | NR             | N                               | Y                   | Low                |

| First author, year | Type of exercise (ex.) according to ProFaNE classification a |                              |                      |        |                           |               |           | Duration in weeks | Total hours b | Delivery Mode c | Ex. supervised | Part. per group d | Program leader | Exercise tailored to individual | Exercise progressed | Exercise Intensity |
|--------------------|--------------------------------------------------------------|------------------------------|----------------------|--------|---------------------------|---------------|-----------|-------------------|---------------|-----------------|----------------|-------------------|----------------|---------------------------------|---------------------|--------------------|
|                    | Balance, Gait or functional                                  | Strength/resistance Training | Flexibility training | 3D ex. | General Physical Activity | Endurance ex. | Other ex. |                   |               |                 |                |                   |                |                                 |                     |                    |
| Toots 2019         | P                                                            | P                            |                      |        |                           |               |           | 16                | 30            | 1               | Y              | NR                | PT             | Y                               | Y                   | High               |
| Toulette 2003      | P                                                            | P                            | P                    |        |                           |               |           | 16                | 24            | 1               | Y              | 5                 | GP             | N                               | N                   | Low                |
| Tuunainen 2013     | P                                                            | P                            | P                    |        |                           |               |           | 13                | 26            | 1               | Y              | 5                 | PT             | N                               | Y                   | High               |
| Varela 2018        |                                                              |                              |                      |        |                           | P             |           | 64                | 112           | 2               | N              | NA                | Self           | N                               | N                   | Low                |
| Yokoi 2015         |                                                              |                              |                      |        | P                         |               |           | 26                | 22            | 2               | Y              | NA                | TNP            | N                               | N                   | Low                |

**a** Classification (P = Primary; S = Secondary);

**b** Minimal dose

**c** Delivery mode (1 = Group, 2 = Individual, 3= combined);

**d** Maximum participants in a group

N = No, Y = Yes, NA = Not applicable, NR = Not reported, TNP = trained non-exercise professional, EP = exercise physiologist, PT = physiotherapist, GP = general practitioner
